# Supplementary material
Source: PubMed Central journal article supplement (PMC4114308)
Supplement: NIHMS593416-supplement-suppl_table.pdf [file NIHMS593416-supplement-suppl_table.pdf]

**A**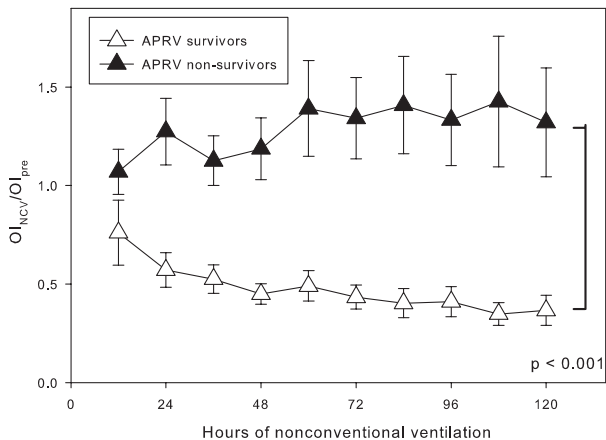**B**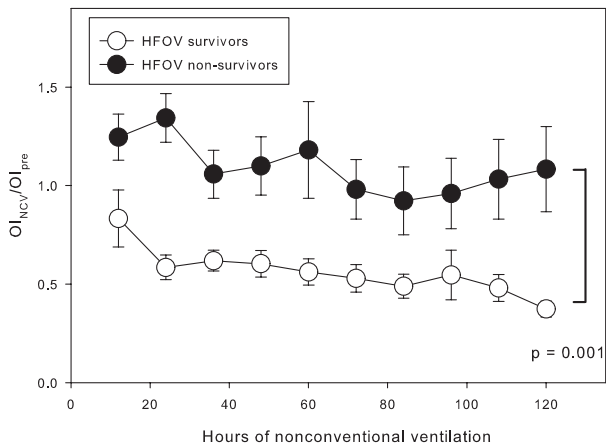

**Supplementary Figure 1:** Change in fractional OI ( $OI_{\text{NCV}}/OI_{\text{pre}}$ ) over hours of NCV between survivors and non-survivors transitioned to either (A) APRV or (B) HFOV. The OI before transition to nonconventional ventilation is designated  $OI_{\text{pre}}$ .  $OI_{\text{NCV}}$  was calculated every 12 hours for the first 5 days after transition, and is reported as a fraction of  $OI_{\text{pre}}$ . Values of  $OI_{\text{NCV}}/OI_{\text{pre}}$  are expressed as mean ( $\pm$  sem). Multilevel mixed effects linear regression was used to test the relationship between survival status and the change in OI over time, with a significant effect of survival status on  $OI_{\text{NCV}}/OI_{\text{pre}}$  over time in both APRV ( $p < 0.001$ ) and HFOV ( $p = 0.001$ ) cohorts.
